# Supplementary material for: No Evidence That Circulating GLP-1 or PYY Are Associated with Increased Satiety during Low Energy Diet-Induced Weight Loss: Modelling Biomarkers of Appetite
Source: MDPI journal article supplement (doi:10.3390/nu15102399), 2023-05-20
Supplement: s1 [file s1]

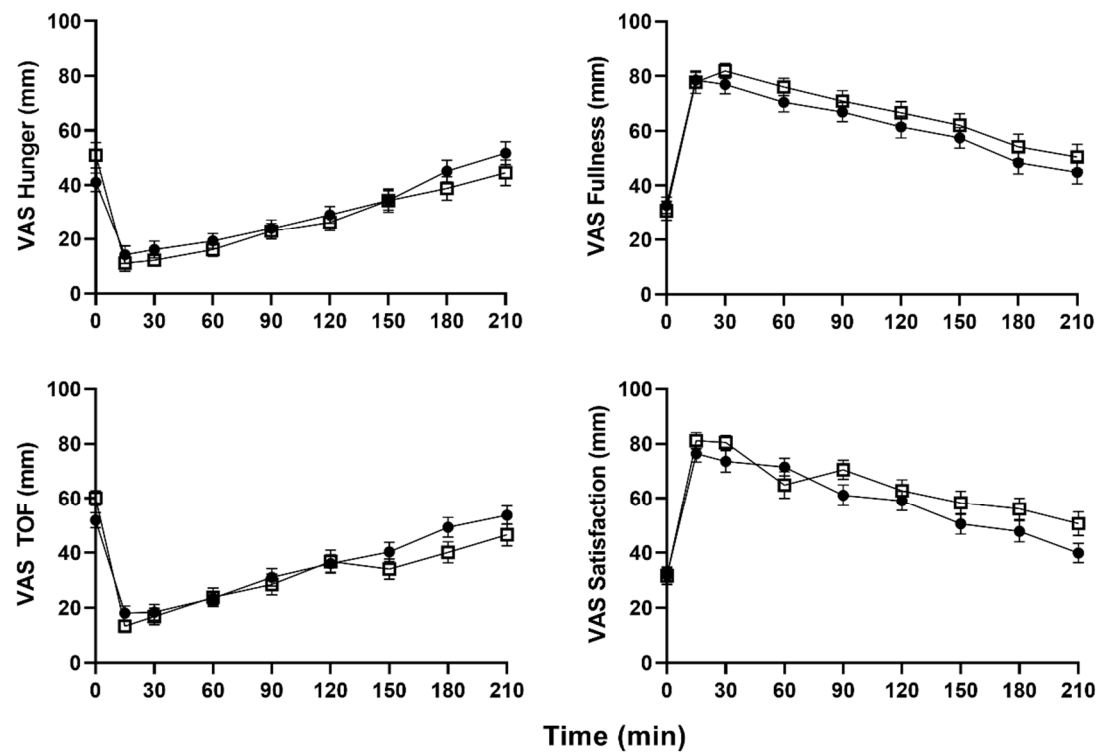

**Supplementary Figure S1.** Postprandial VAS ratings. Data reported as mean ( $\pm$ SEM) Hunger, Fullness, Thoughts of Food (TOF), and Satisfaction. Close circle represents Week 0; Open square represents Week 8.

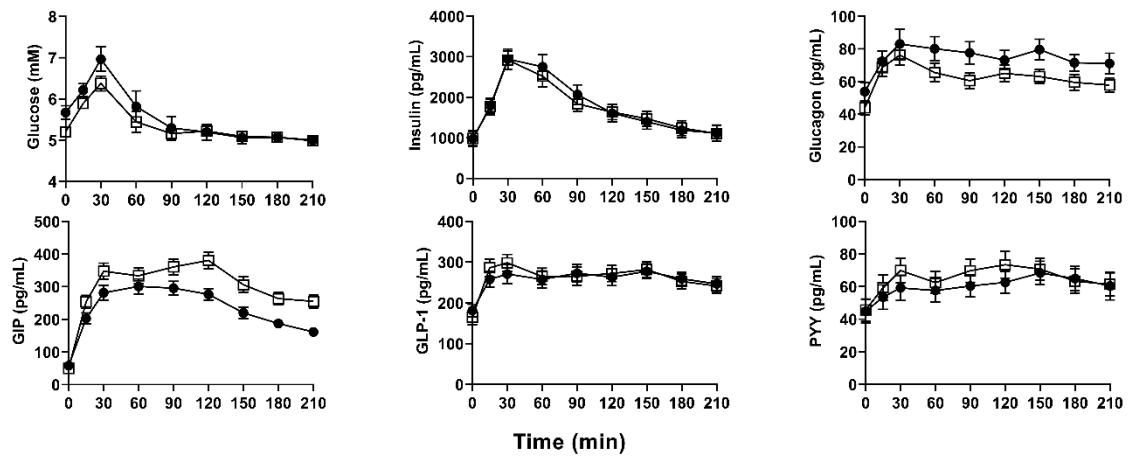

**Supplementary Figure S2.** Postprandial concentrations of glucose, GI peptides, and glucoregulatory peptides. Data reported as mean ( $\pm$ SEM) Hunger, Fullness, Thoughts of Food (TOF), and Satisfaction. Closed circle represents Week 0; Open square represents Week 8.

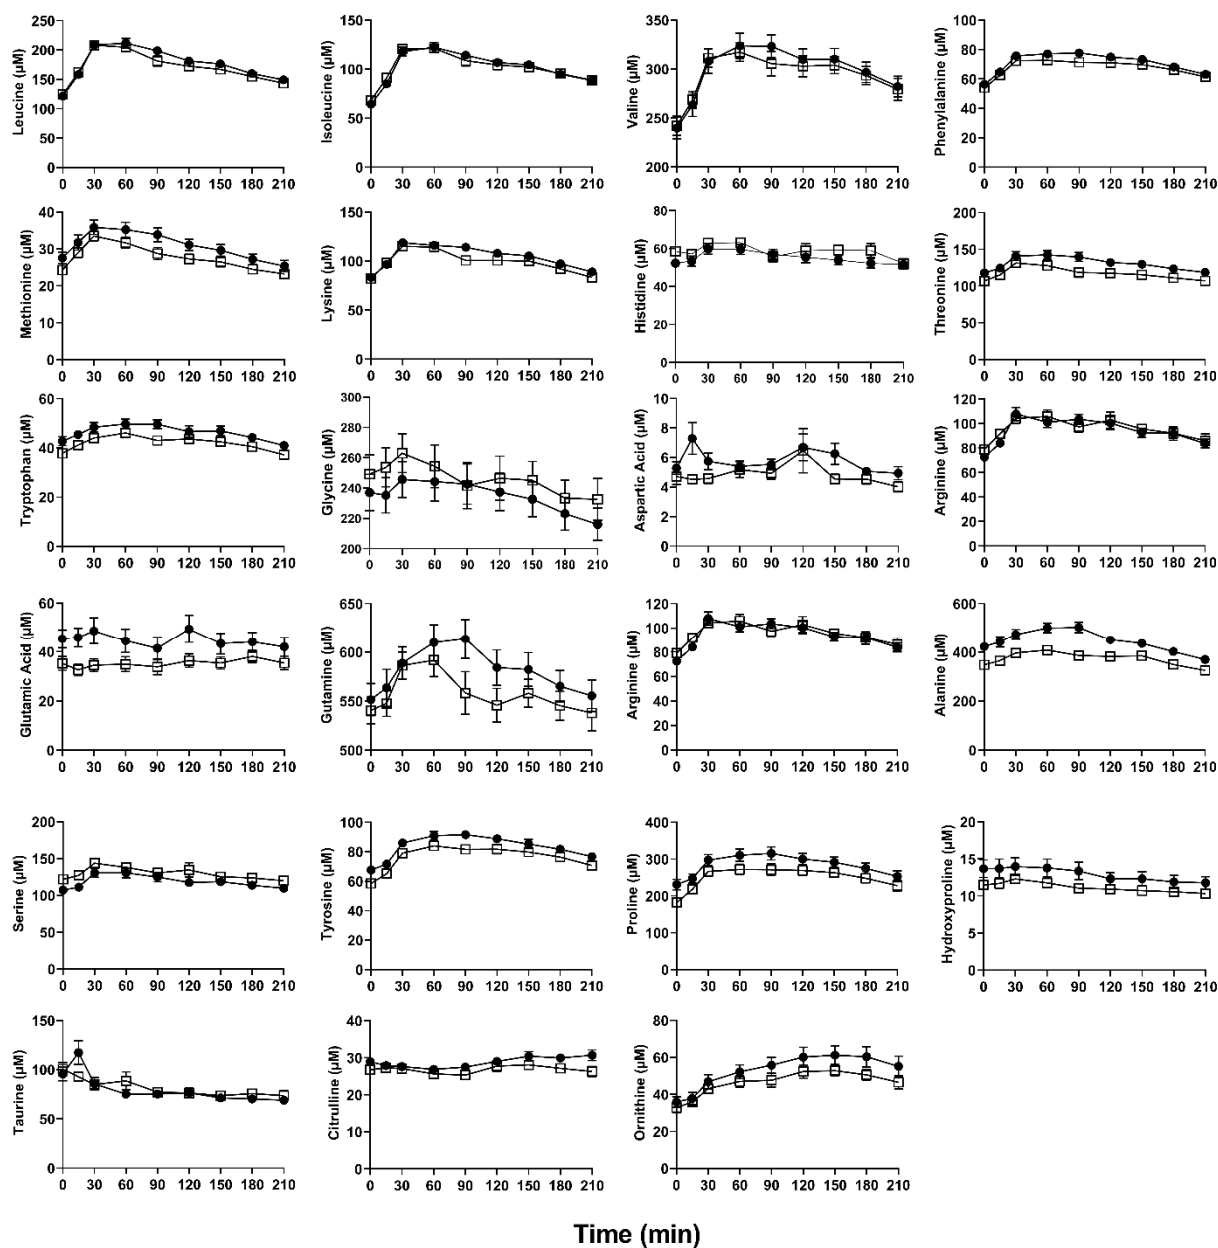

**Supplementary Figure S3.** Postprandial concentrations of amino acids. Data reported as mean (±SEM). Closed circle represents Week 0; Open square represents Week 8.
